# Supplementary material
Source: publisher figshare collection journal article supplement (https://tandf.figshare.com/ndownloader/files/18714977)
Supplement: Supplementary file 1 [file 18714977]

**Supplementary 1.** Characters and its corresponding states used in the phylogenetic analysis from Cusimano et al. (2011) modified from Stockey et al. (2016).

0. Habitat of growth; (0) not aquatic, (1) fresh water or brackish

1. Aquatic habit; (0) helophytes, (1) floating aquatics, (2) submerged aquatics

2. Phyllotaxy; (0) distichous, (1) helical

3. Stem; (0) with nodes and internodes, (1) as centrum, (2) apparently absent

4. Budding from pouch; (0) absent, (1) present

5. Vegetative reproduction by fragmentation; (0) absent, (1) present

6. Vegetative reproduction by stolons; (0) present, (1) absent

7. Stem stele; (0) atactostele, (1) protostele or strand, (2) absent

8. Prickles on stem or petiole; (0) absent, (1) present

9. Petiole; (0) present, (1) absent

10. Leaf; (0) simple, (1) compound

11. Trumpet-shaped leaves with inflated aerenchymatous petiole; (0) absent, (1) present

12. Leaf (blade) shape; (0) equitant, (1) linear to strap shaped, (2) sagittate or cordate, (3) circular to reniform, (4) globose

13. Blade base shape; (0) acute, cuneate, obtuse, or rounded, (1) cordate-sagittate, (2) equitant

14. Leaf division; (0) not lobed, (1) lobed

15. Leaf margin; (0) entire, (1) not entire (serrate, dentate, crenate)

16. Leaf blade with apical notch; (0) absent, (1) present

17. Auricle; (0) absent, (1) present

18. Leaves with distinct abaxial pad or zone of aerenchyma; (0) absent, (1) present

19. Major venation in leaf/frond, (0) pinnate, (1) not pinnate

20. Marginal vein; (0) present, (1) absent

21. Anastomosing veins reticulate; (0) present, (1) absent

22. Differentiated conducting cells in leaf/frond venation; (0) present, (1) absent

23. Pubescence; (0) largely absent, (1) as trichomes, (2) as papillae

24. Roots; (0) present, (1) absent

25. Lateral roots; (0) present, (1) absent

26. Vessels in root; (0) present, (1) absent

27. Spathe; (0) present, (1) absent

28. Spadix/inflorescence with; (0) numerous flowers, (1) fewer than five flowers

29. Spadix zonation; (0) no zonation, (1) male-female, (2) female-sterile-male, (3) female-male-sterile, (4) female-sterile-malesterile

30. Flowers; (0) bisexual, (1) unisexual; character 20 of Stockey et al. (1997)

31. Perianth/perigonium; (0) present, (1) absent

32. Number of ovules per locule; (0) six or more, (1) five or less

33. Placentation; (0) axile or strongly intrusive placentae, (1) apical, (2) parietal, septa very reduced, (3) basal, basal-parietal, or basal-axile

34. Ovule type; (0) anatropous and hemianatropous, (1) amphitropous, (2) orthotropous and hemiorthotropous

35. Operculate seed; (0) absent, (1) present

36. Number of stamens; (0) four to six, (1) fewer than four or more than six

37. Stamen connation; (0) free, (1) connate (and connate at base)

38. Sporangia per anther; (0) four, (1) two

39. Position of anther dehiscence; (0) lateral, (1) apical

40. Anther dehiscence; (0) by longitudinal slits, (1) by oblique pore-like slits, (2) by apical pores or apical slits, (3) by single continuous slit

41. Pollen shape; (0) ellipsoid, (1) boat-shaped, (2) globose or spheroidal

42. Pollen aperture type; (0) monosulcate, (1) monoporate, (2) zonate, (3) inaperturate, (4) ulcerate, (5) polyaperturate, (6) foraminate

43. Sporopollenin; (0) present, (1) absent

44. Pollen wall ultrastructure; (0) granular, (1) alveolar

45. Exine sculpturing; (0) foveolate-reticulate, (1) spinose, (2) striate, (3) psilate
